# Supplementary material
Source: PubMed Central journal article supplement (PMC4256773)
Supplement: 7af106aa0030c6c1e8e658b4717435ab_genetics.114.167973-1.pdf [file 7af106aa0030c6c1e8e658b4717435ab_genetics.114.167973-1.pdf]

---

# File S1

Purifying selection, drift and reversible  
mutation with arbitrarily high  
mutation rates

Supporting Information

Brian Charlesworth and Kavita Jain

---

## Analytical approximations for the fraction of segregating sites

The proportion  $p_{seg}$  of segregating sites is given by

$$p_{seg} = 1 - p(n) - p(0) \quad (\text{S1.1})$$

where

$$p(k) = \int_0^1 dq \binom{n}{k} q^k (1-q)^{n-k} \phi(q) \quad (\text{S1.2})$$

and

$$\phi(q) = C e^{\gamma q} q^{\beta-1} (1-q)^{\alpha-1} \quad (\text{S1.3})$$

*Moments of the frequencies  $q$  and  $p$ :* We first consider  $p(n) = \bar{q}^n$  which is given by

$$p(n) = \frac{(\beta)_n}{(\alpha + \beta)_n} \frac{{}_1F_1(n + \beta, n + \alpha + \beta, \gamma)}{{}_1F_1(\beta, \alpha + \beta, \gamma)} \quad (\text{S1.4})$$

$$= \frac{(\beta)_n}{(\alpha + \beta)_n} \frac{1 + \sum_{j=1}^{\infty} G_j^{(n)} \frac{\gamma^j}{j!}}{1 + \sum_{j=1}^{\infty} G_j^{(0)} \frac{\gamma^j}{j!}} \quad (\text{S1.5})$$

where

$$G_j^{(n)} = \frac{(n + \beta)_j}{(n + \alpha + \beta)_j} \quad (\text{S1.6})$$

and  $(a)_j$  is the Pochhammer's symbol. For  $\alpha, \beta \rightarrow 0$  with  $\kappa = \alpha/\beta$  finite, we have

$$G_j^{(n)} \approx \begin{cases} 1 - \alpha(H_{n+j-1} - H_{n-1}), & n > 0 \\ \frac{1}{1+\kappa} (1 - \alpha H_{j-1}), & n = 0 \end{cases} \quad (\text{S1.7})$$

where  $H_j = \sum_{k=1}^j (1/k)$  is the  $j$ th Harmonic number. Also, we can write

$$\frac{(\beta)_n}{(\alpha + \beta)_n} \approx \frac{1}{1 + \kappa} (1 - \alpha H_{n-1}) \quad (\text{S1.8})$$

Substituting the above approximations in the expression for  $p(n)$  and keeping

---

terms to order  $\alpha$ , we finally obtain

$$p(n) \approx \frac{1}{1 + \kappa e^{-\gamma}} \left( 1 - \alpha H_{n-1} e^{-\gamma} - \frac{\alpha e^{-\gamma}}{1 + \kappa e^{-\gamma}} (S_1(n) + \kappa S_2(n)) \right) \quad (\text{S1.9})$$

where

$$S_1(n) = \sum_{j=1}^{\infty} (H_{n+j-1} - H_{j-1}) \frac{\gamma^j}{j!} \stackrel{\gamma \gg 1}{\approx} \frac{e^\gamma}{\gamma} (n + c_1 \gamma^{-1}) \quad (\text{S1.10})$$

$$S_2(k) = e^{-\gamma} \sum_{j=1}^{\infty} H_{n+j-1} \frac{\gamma^j}{j!} \stackrel{\gamma \gg 1}{\approx} \ln \gamma \quad (\text{S1.11})$$

We note that the dependence on  $n$  appears at order  $\alpha$ . Thus in the infinite sites model where these terms are neglected, all the moments of fraction  $q$  are equal. Setting  $n = 1$  and  $2$  in the above equations reproduces the results for  $\bar{q}$  in (7a) and (7b), and for  $\overline{q - q^2}$  in (13) (after dividing by 2) given in the main text. In the neutral case, we have

$$p(n) \approx \frac{1 - \alpha H_{n-1}}{1 + \kappa} \quad (\text{S1.12})$$

while in the strong selection limit, using the asymptotic results for the sums  $S_1(n)$  and  $S_2(n)$ , we get

$$1 - p(n) = \frac{1}{1 + \kappa^{-1} e^\gamma} \left( 1 + \frac{\alpha}{\kappa} \left( H_{n-1} + \frac{n e^\gamma}{\gamma} \right) \right) \quad (\text{S1.13})$$

For  $\gamma \rightarrow \infty$ , the above expression shows that  $1 - p(n) \rightarrow \alpha n / \gamma$ .

We next consider  $p(0) = \overline{(1 - q)^n}$  which is given by

$$p(0) = \frac{(\alpha)_n}{(\alpha + \beta)_n} \frac{{}_1F_1(\beta, n + \alpha + \beta, \gamma)}{{}_1F_1(\beta, \alpha + \beta, \gamma)} \quad (\text{S1.14})$$

For  $\alpha, \beta \rightarrow 0$  but arbitrary  $n$  and  $j$ , we can write

$$\frac{(\beta)_j}{(n + \alpha + \beta)_j} \approx \beta \frac{(j - 1)!(n - 1)!}{(n + j - 1)!} \quad (\text{S1.15})$$

---

Using the above approximation and as before, keeping terms to order  $\alpha$ , we find that

$$p(0) \approx \frac{\kappa e^{-\gamma}}{1 + \kappa e^{-\gamma}} \left( 1 - \frac{\alpha}{\kappa} H_{n-1} + \frac{\alpha(n-1)!}{\kappa} S_3(n) + \frac{\alpha S_2(0)}{1 + \kappa e^{-\gamma}} \right) \quad (\text{S1.16})$$

where

$$S_3(n) = \sum_{j=1}^{\infty} \frac{\gamma^j}{j(n+j-1)!} \stackrel{\gamma \gg 1}{\approx} \frac{e^\gamma}{\gamma^n} \quad (\text{S1.17})$$

In the case of neutrality, we have

$$p(0) = \frac{\kappa - \alpha H_{n-1}}{1 + \kappa} \quad (\text{S1.18})$$

and in the strong selection limit, we get

$$p(0) = \frac{1}{1 + \kappa^{-1} e^\gamma} \left( 1 - \frac{\alpha}{\kappa} \left( H_{n-1} - \frac{(n-1)! e^\gamma}{\gamma^n} \right) \right) \quad (\text{S1.19})$$

For  $\gamma \rightarrow \infty$ , the fraction  $p(0) \rightarrow \alpha(n-1)!/\gamma^n$ .

*Segregating site fraction ( $p_{seg}$ ):* Using the above results, we can now look at the behavior of  $p_{seg}$ . For  $\gamma = 0$ , both  $p(0)$  and  $1 - p(n)$  contribute equally (in magnitude) to give

$$p_{seg} = \frac{2\alpha H_{n-1}}{1 + \kappa} \quad (\text{S1.20})$$

Since  $H_n \sim \ln n + \gamma_{EM}$  for large  $n$ , the proportion of segregating sites increases logarithmically with the sample size in the neutral case. For  $\beta = 0.02$ , the above expression gives  $p_{seg} = 0.094$  and  $0.156$  for  $n = 20$  and  $200$  respectively which are close to the data in Table 1 of the main text. In the strong selection limit, for large  $\gamma$ , we have

$$p_{seg} \approx \frac{\alpha n}{\gamma} \quad (\text{S1.21})$$

which increases linearly with the sample size.

One can also look at the  $\beta \rightarrow \infty$  limit. For the neutral case, we have

$$p_{seg} = 1 - \frac{(\alpha)_n + (\beta)_n}{(\alpha + \beta)_n} \quad (\text{S1.22})$$

---

For  $n \ll \alpha, \beta$ , we can write

$$\frac{(\alpha)_n}{(\alpha + \beta)_n} \approx \left( \frac{\kappa}{1 + \kappa} \right)^n \quad (\text{S1.23})$$

while for  $n \gg \alpha, \beta$ , using Stirling's approximation  $s! \sim \sqrt{2\pi s}(s/e)^s$ , we get

$$\frac{(\alpha)_n}{(\alpha + \beta)_n} \approx \frac{(\alpha + \beta - 1)!}{(\alpha - 1)!} n^{-\beta} \quad (\text{S1.24})$$

Using these approximations, we find that

$$1 - p_{seg} = \begin{cases} \frac{1+\kappa^n}{(1+\kappa)^n}, & n \ll \alpha, \beta \\ (\alpha + \beta - 1)! \left( \frac{1}{(\alpha-1)!n^\beta} + \frac{1}{(\beta-1)!n^\alpha} \right), & n \gg \alpha, \beta \end{cases} \quad (\text{S1.25})$$

Thus in small samples (relative to scaled mutation rates),  $p_{seg}$  approaches unity exponentially fast while for larger samples, the approach is algebraic.
